# Supplementary material for: Restoring oak forests through direct seeding or planting: Protocol for a continental-scale experiment
Source: PubMed Central journal article supplement (PMC8568285; doi:10.1371/journal.pone.0259552), 2021-11-04

# Restoring vegetation through direct seeding or planting: A continental-scale experiment

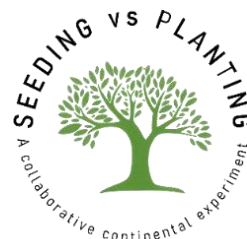

## Timing of the experiment

|              |                                    | 2021                            |                                                  |                                 | 2022                    |                                              |  | 2023                                                                                                   |              |                                            | 2024         |                              |          |                                            |                                 |
|--------------|------------------------------------|---------------------------------|--------------------------------------------------|---------------------------------|-------------------------|----------------------------------------------|--|--------------------------------------------------------------------------------------------------------|--------------|--------------------------------------------|--------------|------------------------------|----------|--------------------------------------------|---------------------------------|
| ACTION       |                                    |                                 |                                                  |                                 |                         |                                              |  |                                                                                                        |              |                                            |              |                              |          |                                            |                                 |
| PARTICIPANTS | Site preparation                   |                                 | Soil preparation. Marking plots and plant-points | Weeding*                        | Weeding*                | Weeding*                                     |  | Soil preparation. Weeding*                                                                             | Weeding*     | Weeding*                                   |              | Weeding*                     | Weeding* | Weeding*                                   |                                 |
|              | Seed preparation                   |                                 | Seed collection, selection, storage              |                                 |                         |                                              |  |                                                                                                        |              |                                            |              |                              |          |                                            |                                 |
|              | Seeding                            |                                 | Seeding in the field                             |                                 | Measure emergence       |                                              |  | Initial seedling measurements                                                                          |              | Seedling measurements after growing season |              | Assess survival after winter |          | Seedling measurements after growing season |                                 |
|              | Planting                           |                                 | Start nursery cultivation                        |                                 |                         |                                              |  | Outplanting nursery seedlings & Initial seedling measurements. Dead-seedling replacement & measurement |              | Seedling measurements after growing season |              | Assess survival after winter |          | Seedling measurements after growing season |                                 |
|              | Deliverables                       |                                 | Send site and species info. Post seeds and soil  |                                 | Data #1                 |                                              |  | Data #2                                                                                                |              | Data #3                                    |              | Data #4                      |          | Data #5                                    | Post dry plants (to be decided) |
| COORDINATORS | Germination test and soil analysis |                                 | Start of germination test                        | Soil analysis                   | End of germination test |                                              |  |                                                                                                        |              |                                            |              |                              |          |                                            |                                 |
|              | Data management                    | Attract and inform participants | Disseminate full study protocol                  |                                 |                         | Prepare emergence, soil and germination data |  |                                                                                                        | Prepare data |                                            | Prepare data |                              |          | Prepare and analyse data                   |                                 |
|              | Write-up                           |                                 |                                                  | Write up introduction & methods |                         |                                              |  | Update introduction & methods                                                                          |              |                                            |              |                              |          | Prepare results & discussion               |                                 |

\*when ~80% of the plots is covered by herbs

### Material requirements

The experiment is non-funded.

Participants will need:

- Local seeds
- Site for planting
- Greenhouse or a nursery facility for plant cultivation
- Transportation of containerized seedlings
- Materials for digging, marking plots and tagging plants
- Oven, lab & field scales
- Ruler & caliper

### Deliverables

- Beginning**
  - \* Seeds for germination test
  - \* Composite soil sample
- End**
  - \* Oven-dried plants
- Along the experiment**
  - Data and information
    - Species selection
    - Site selection
    - Data

### Next steps

[Register](#) if you haven't done so

Have a look at the [map](#)!

Complete protocol will be ready in autumn.

Precise site locations and species to be requested soon

Any questions, please contact

[seedvsplant@gmail.com](mailto:seedvsplant@gmail.com)

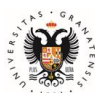

UNIVERSIDAD DE GRANADA

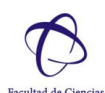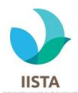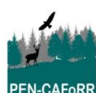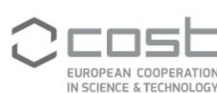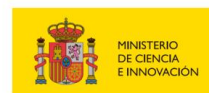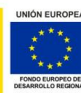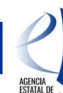

Supplement: pone.0259552.s003.pdf [file pone.0259552.s003.pdf]
