# Supplementary material for: Restoring oak forests through direct seeding or planting: Protocol for a continental-scale experiment
Source: PubMed Central journal article supplement (PMC8568285; doi:10.1371/journal.pone.0259552), 2021-11-04

# Restoring vegetation through direct seeding or planting: A continental-scale experiment

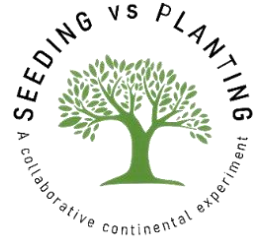

## Acorn collection

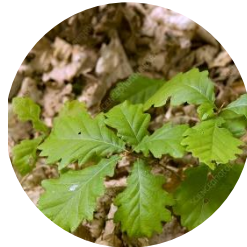

Target species

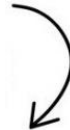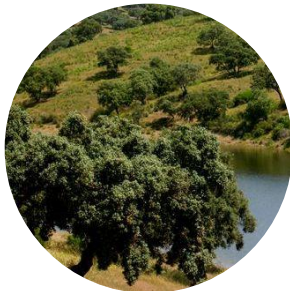

Identification of a source population

- Minimum 10 parent trees
- Local populations growing at similar elevation, aspect and substrate and near the experimental site.
- Collect ripe acorns and from the tree if possible

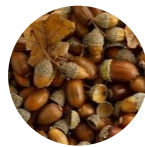

Seed collection

- Similar # of seeds / parent tree
- Needed: 72 seeded + 72 nursery-grown + 150 germination test = 294 sound acorns. Recommended: **minimum 500 acorns**

## To take into account

- If necessary, local seeds may **exceptionally be bought**.
- Acorn **selection**: flotation method.
- Acorn **storage**: in zip polyethylene plastic bags 50 µm thick (which we will send you) → refrigerator 1 –4 °C. Avoid stacking bags!
- **Subsequent use** of the seeds should occur as soon as conditions allow it (within weeks).
- Soon after collection, a **parcel** should be posted to Granada containing 150 seeds and a composite soil sample from the experimental site (more info soon!).

## Next steps

Have a look at the [map](#)!

Any questions, please contact [seedvsplant@gmail.com](mailto:seedvsplant@gmail.com)

Fill in the attached site form.

Full protocol available by next week.

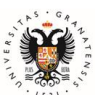

UNIVERSIDAD  
DE GRANADA

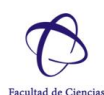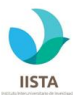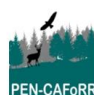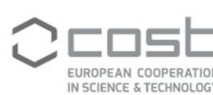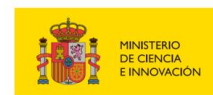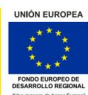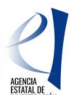

Supplement: pone.0259552.s004.pdf [file pone.0259552.s004.pdf]
