# Supplementary material for: Restoring oak forests through direct seeding or planting: Protocol for a continental-scale experiment
Source: PubMed Central journal article supplement (PMC8568285; doi:10.1371/journal.pone.0259552), 2021-11-04

# PLOS ONE

## Restoring vegetation through direct seeding or planting: Protocol for a continental-scale experiment --Manuscript Draft--

|                                |                                                                                                                                                                                                                                                                                                                                                                                                                                                                                                                                                                                                                                                                                                                                                                                                                                                                                                                                                                                                                                                                                                                                                                                                                                                                                                                                                                                                                                                                                                                                                                                                                                                                                            |
|--------------------------------|--------------------------------------------------------------------------------------------------------------------------------------------------------------------------------------------------------------------------------------------------------------------------------------------------------------------------------------------------------------------------------------------------------------------------------------------------------------------------------------------------------------------------------------------------------------------------------------------------------------------------------------------------------------------------------------------------------------------------------------------------------------------------------------------------------------------------------------------------------------------------------------------------------------------------------------------------------------------------------------------------------------------------------------------------------------------------------------------------------------------------------------------------------------------------------------------------------------------------------------------------------------------------------------------------------------------------------------------------------------------------------------------------------------------------------------------------------------------------------------------------------------------------------------------------------------------------------------------------------------------------------------------------------------------------------------------|
| <b>Manuscript Number:</b>      | PONE-D-21-24564                                                                                                                                                                                                                                                                                                                                                                                                                                                                                                                                                                                                                                                                                                                                                                                                                                                                                                                                                                                                                                                                                                                                                                                                                                                                                                                                                                                                                                                                                                                                                                                                                                                                            |
| <b>Article Type:</b>           | Study Protocol                                                                                                                                                                                                                                                                                                                                                                                                                                                                                                                                                                                                                                                                                                                                                                                                                                                                                                                                                                                                                                                                                                                                                                                                                                                                                                                                                                                                                                                                                                                                                                                                                                                                             |
| <b>Full Title:</b>             | Restoring vegetation through direct seeding or planting: Protocol for a continental-scale experiment                                                                                                                                                                                                                                                                                                                                                                                                                                                                                                                                                                                                                                                                                                                                                                                                                                                                                                                                                                                                                                                                                                                                                                                                                                                                                                                                                                                                                                                                                                                                                                                       |
| <b>Short Title:</b>            | Restoring vegetation through direct seeding or planting: Protocol for a continental-scale experiment                                                                                                                                                                                                                                                                                                                                                                                                                                                                                                                                                                                                                                                                                                                                                                                                                                                                                                                                                                                                                                                                                                                                                                                                                                                                                                                                                                                                                                                                                                                                                                                       |
| <b>Corresponding Author:</b>   | Alexandro B Leverkus<br>Universidad de Granada - Campus Fuentenueva: Universidad de Granada<br>SPAIN                                                                                                                                                                                                                                                                                                                                                                                                                                                                                                                                                                                                                                                                                                                                                                                                                                                                                                                                                                                                                                                                                                                                                                                                                                                                                                                                                                                                                                                                                                                                                                                       |
| <b>Keywords:</b>               | Reforestation; Quercus spp; oak; ecological restoration; sowing; plantation; collaborative experiment; Meta-analysis                                                                                                                                                                                                                                                                                                                                                                                                                                                                                                                                                                                                                                                                                                                                                                                                                                                                                                                                                                                                                                                                                                                                                                                                                                                                                                                                                                                                                                                                                                                                                                       |
| <b>Abstract:</b>               | The choice of revegetating via direct seeding or planting nursery-grown seedlings defines the potential stresses suffered by seedlings. The balance may ultimately depend on how species identity and traits such as seed size interact with environmental conditions. To test this, we will conduct a continental-scale experiment consisting of one mini-experiment replicated by multiple participants across Europe. Each participant will establish a site with sown and planted individuals of one or more locally growing oak ( Quercus ) species; the selection of this genus aims to favour continental-scale participation and to allow testing the response of a widely distributed genus of broad ecological relevance. At each site, participants will follow a standardised protocol for seed collection, seeding in the field, nursery cultivation, outplanting, protection against herbivores, site maintenance, and measurement of seedling performance and environmental variables – all of which we describe here. Each measurement on each species at each site will produce one effect size; the data will be analysed through mixed-effects meta-analysis. With this approach we will assess the main effect of revegetation method and the potential effect of site-specific effect moderators. Overall, we will provide a continental-scale estimate on the seeding vs . planting dilemma and analyse to what extent the differences in environmental conditions across sites, seed size, and the phylogenetic relatedness of species can account for the differences in the effect of revegetation method on seedling performance across study sites and species. |
| <b>Order of Authors:</b>       | Alexandro B Leverkus<br>Laura Levy<br>Enrique Andivia<br>Peter Annighöfer<br>Bart De Cuyper<br>Vladan Ivetic<br>Dagnija Lazdina<br>Magnus Löf<br>Palle Madsen<br>Pedro Villar-Salvador                                                                                                                                                                                                                                                                                                                                                                                                                                                                                                                                                                                                                                                                                                                                                                                                                                                                                                                                                                                                                                                                                                                                                                                                                                                                                                                                                                                                                                                                                                     |
| <b>Additional Information:</b> |                                                                                                                                                                                                                                                                                                                                                                                                                                                                                                                                                                                                                                                                                                                                                                                                                                                                                                                                                                                                                                                                                                                                                                                                                                                                                                                                                                                                                                                                                                                                                                                                                                                                                            |
| <b>Question</b>                | <b>Response</b>                                                                                                                                                                                                                                                                                                                                                                                                                                                                                                                                                                                                                                                                                                                                                                                                                                                                                                                                                                                                                                                                                                                                                                                                                                                                                                                                                                                                                                                                                                                                                                                                                                                                            |
| <b>Financial Disclosure</b>    | This collaborative experiment lacks specific funding and was designed to be as small, low-cost, and easy-to-implement as possible for each participant. The resources                                                                                                                                                                                                                                                                                                                                                                                                                                                                                                                                                                                                                                                                                                                                                                                                                                                                                                                                                                                                                                                                                                                                                                                                                                                                                                                                                                                                                                                                                                                      |

Enter a financial disclosure statement that describes the sources of funding for the work included in this submission. Review the [submission guidelines](#) for detailed requirements. View published research articles from [PLOS ONE](#) for specific examples.

This statement is required for submission and **will appear in the published article** if the submission is accepted. Please make sure it is accurate.

#### Unfunded studies

Enter: *The author(s) received no specific funding for this work.*

#### Funded studies

Enter a statement with the following details:

- Initials of the authors who received each award
- Grant numbers awarded to each author
- The full name of each funder
- URL of each funder website
- Have or will the sponsors or funders play any role in the study design, data collection (when applicable) and analysis, decision to publish, or preparation of the manuscript?
- **NO** - Include this sentence at the end of your statement: *The funders had and will not have a role in study design, data collection and analysis, decision to publish, or preparation of the manuscript.*
- **YES** - Specify the role(s) played.

\* typeset

#### Competing Interests

Use the instructions below to enter a competing interest statement for this submission. On behalf of all authors, disclose any [competing interests](#) that could be perceived to bias this work—acknowledging all financial support and any other relevant financial or non-financial competing interests.

This statement is **required** for submission and **will appear in the published article** if the submission is accepted. Please make

necessary to establish and monitor each experimental site as described in this document will be made available by each participant. Funding for the coordination of this experiment is available from grant RTI2018-096187-J-100 from FEDER/ Spanish Ministry of Science, Innovation and Universities.

Upon requirement from the editors after submission, I attach a confirmation letter on the indicated grant. Note that the grant is for a project on seeding vs planting of oaks but that the study described in this protocol was not originally included in the project.

The authors have declared that no competing interests exist.

sure it is accurate and that any funding sources listed in your Funding Information later in the submission form are also declared in your Financial Disclosure statement.

View published research articles from [PLOS ONE](#) for specific examples.

**NO authors have competing interests**

Enter: *The authors have declared that no competing interests exist.*

**Authors with competing interests**

Enter competing interest details beginning with this statement:

*I have read the journal's policy and the authors of this manuscript have the following competing interests: [insert competing interests here]*

\* typeset

**Ethics Statement**

Enter an ethics statement for this submission. This statement is required if the study involved:

- Human participants
- Human specimens or tissue
- Vertebrate animals or cephalopods
- Vertebrate embryos or tissues
- Field research

Write "N/A" if the submission does not require an ethics statement.

General guidance is provided below. Consult the [submission guidelines](#) for detailed instructions. **Make sure that all information entered here is included in the Methods section of the manuscript.**

N/A

**Format for specific study types**

**Human Subject Research (involving human participants and/or tissue)**

- Give the name of the institutional review board or ethics committee that approved the study
- Include the approval number and/or a statement indicating approval of this research
- Indicate the form of consent obtained (written/oral) or the reason that consent was not obtained (e.g. the data were analyzed anonymously)

**Animal Research (involving vertebrate animals, embryos or tissues)**

- Provide the name of the Institutional Animal Care and Use Committee (IACUC) or other relevant ethics board that reviewed the study protocol, and indicate whether they approved this research or granted a formal waiver of ethical approval
- Include an approval number if one was obtained
- If the study involved *non-human primates*, add *additional details* about animal welfare and steps taken to ameliorate suffering
- If anesthesia, euthanasia, or any kind of animal sacrifice is part of the study, include briefly which substances and/or methods were applied

**Field Research**

Include the following details if this study involves the collection of plant, animal, or other materials from a natural setting:

- Field permit number
- Name of the institution or relevant body that granted permission

**Data Availability**

Authors are required to make the data underlying their research findings fully available, without restriction.

If the manuscript reports pilot or preliminary results, the data underlying those results must be made available at the time of publication. A Data Availability

N/A - the protocol does not report results

Statement describing where the data can be found is required at submission. Your answers to this question constitute the Data Availability Statement and will be published in the article, if accepted. When legal or ethical requirements prohibit public data sharing, authors must indicate how researchers may obtain access to the data. See the [PLOS Data Policy](#) and [FAQ](#) for detailed information.

**Important:** Stating 'data available on request from the author' is not sufficient. If your data are only available upon request, select 'No' for the first question and explain your situation in the text box.

For protocols without pilot or preliminary data, authors are strongly encouraged to state how they plan to share research data from their study when it is completed or published.

Do the authors confirm that EITHER the protocol does not report results OR all data underlying the preliminary results will be made fully available without restriction?

**Describe where the data may be found in full sentences. If you are copying our sample text, replace any instances of XXX with the appropriate details.**

- If **no pilot data are reported** in the manuscript, please enter the following:  
*No datasets were generated or analysed during the current study. All relevant data from this study will be made available upon study completion.*
- If the manuscript reports pilot data **held in a public repository**, include URLs, accession numbers or DOIs. If this information will only be available after acceptance, indicate this by ticking the box below. For example: *All XXX files are available from the XXX database*

No datasets were generated or analysed during the current study. All relevant data from this study will be made available upon study completion.

(accession number(s) **XXX, XXX**).

- If the manuscript reports pilot data contained **within the manuscript and/or Supporting Information files**, enter the following:

*All relevant data are within the manuscript and its Supporting Information files.*

- If neither of these applies but you are able to provide **details of access elsewhere**, with or without limitations, please do so. For example:

*Data cannot be shared publicly because of [XXX]. Data are available from the **XXX** Institutional Data Access / Ethics Committee (contact via **XXX**) for researchers who meet the criteria for access to confidential data.*

*The data underlying the results presented in the study are available from (include the name of the third party and contact information or URL).*

- This text is appropriate if the data are owned by a third party and authors do not have permission to share the data.

For study protocols with data management or sharing plans, authors are encouraged to briefly describe in their Data Availability Statement how data they generate will be made accessible when the study is completed. For example:

- Deidentified research data will be made publicly available when the study is completed and published.

\* typeset

Additional data availability information:

# 1           **Restoring vegetation through direct seeding or** 2           **planting: Protocol for a continental-scale experiment**

3  
4  
5   Alexandro B. Leverkus<sup>1,2\*</sup>, Laura Levy<sup>1</sup>, Enrique Andivia<sup>3</sup>, Peter Annighöfer<sup>4</sup>, Bart  
6   De Cuyper<sup>5</sup>, Vladan Ivetic<sup>6</sup>, Dagnija Lazdina<sup>7</sup>, Magnus Löf<sup>8</sup>, Palle Madsen<sup>9</sup>,  
7   Pedro Villar-Salvador<sup>10</sup>

8  
9   <sup>1</sup> Departamento de Ecología, Facultad de Ciencias, Universidad de Granada, 18071, Granada.

10   <sup>2</sup> Laboratorio de Ecología, Instituto Interuniversitario de Investigación del Sistema Tierra en  
11   Andalucía (IIISTA), Universidad de Granada, 18006, Granada, Spain.

12   <sup>3</sup> Departamento de Biodiversidad, Ecología y Evolución, Universidad Complutense de Madrid,  
13   Spain

14   <sup>4</sup> Professorship of Forest and Agroforest Systems, Technical University of Munich, Hans-Carl-v.-  
15   Carlowitz-Platz 2, 85354 Freising, Germany

16   <sup>5</sup> Research Institute for Nature and Forest, 1000 Brussel, Belgium

17   <sup>6</sup> Faculty of Forestry, University of Belgrade, 11030 Belgrade, Serbia

18   <sup>7</sup> Latvian State Forest Research Institute Silava. Salaspils, Latvia

19   <sup>8</sup> Southern Swedish Forest Research Center, Swedish University of Agricultural Sciences, 23053,  
20   Alnarp, Sweden

21   <sup>9</sup> Forest and Landscape College, University of Copenhagen, Fredensborg, 3480, Copenhagen,  
22   Denmark

23   <sup>10</sup>. Universidad de Alcalá, Grupo de Ecología y Restauración Forestal (FORECO),  
24   Departamento de Ciencias de la Vida, 28805 Alcalá de Henares, Madrid, Spain

25   \*Correspondence to: [leverkus@ugr.es](mailto:leverkus@ugr.es)

26

## 27 **Abstract**

28 The choice of revegetating via direct seeding or planting nursery-grown seedlings  
29 **defines** the potential stresses suffered by seedlings. The balance may ultimately  
30 depend on how species identity and traits such as seed size interact with  
31 environmental conditions. To test this, we will conduct a continental-scale  
32 experiment consisting of one mini-experiment replicated by multiple participants  
33 across Europe. Each participant will establish a site with sown and planted  
34 individuals of one or more locally growing oak (*Quercus*) species; the selection  
35 of this genus aims to favour continental-scale participation and to allow testing  
36 the response of a widely distributed genus of broad ecological relevance. At each  
37 site, participants will follow a standardised protocol for seed collection, seeding  
38 in the field, nursery cultivation, outplanting, protection against herbivores, site  
39 maintenance, and measurement of seedling performance and environmental  
40 variables – all of which we describe here. Each measurement on each species at  
41 each site will produce one effect size; the data will be analysed through mixed-  
42 effects meta-analysis. With this approach we will assess the main effect of  
43 revegetation method and the potential effect of site-specific effect moderators.  
44 Overall, we will provide a continental-scale estimate on the seeding vs. planting  
45 dilemma and analyse to what extent the differences in environmental conditions  
46 across sites, seed size, and the phylogenetic relatedness of species can account  
47 for the differences in the effect of revegetation method on seedling performance  
48 across study sites and species.

49

## 50 **Introduction**



51 Roughly 2 billion ha of land are in need of ecological restoration [1]. In recognition  
52 of the importance of restoration for climate mitigation and the provision of  
53 ecosystem services [2,3], the UN Decade on Ecological Restoration provides an  
54 opportunity to advance the science and practice of restoration ecology [4].

55 Revegetation is at the core of restoration actions and it has been  
56 conducted for centuries (e.g., [5]), yet its success is not necessarily guaranteed.  
57 Revegetation failure often results from adverse biotic or abiotic conditions [6],  
58 both of which can be influenced by revegetation method. Revegetation frequently  
59 relies on the planting of nursery-grown seedlings. The alternative, direct seeding,  
60 is often discarded due to presumably low seedling establishment [7] and hence  
61 high **loss of valuable seed material**. Planting can speed seedling growth, and it  
62 avoids seed predation, desiccation, and lack of seedling emergence. Seeding, on  
63 the other hand, is easier and cheaper to carry out [6]. For some species, such  
64 as oaks (*Quercus* spp.), both methods are possible, yet considerable debate still  
65 surrounds the question of which method can maximise outcomes [6].

66 Root morphology is affected by the choice of revegetation method, with  
67 potential implications for the access to soil resources of plant species that  
68 develop deep roots. This is the case in oaks, as the tap root of nursery-grown  
69 seedlings is often pruned or deformed [6]. This may reduce access to soil  
70 resources, and ultimately hinder seedling performance under water shortage,  
71 with effects that can last until **adulthood** [8]. The success of revegetation in terms  
72 of seedling performance may thus depend on the interaction of species' traits  
73 **(such as root depth, related to seed size)** and environmental conditions (such as  
74 climate and soil characteristics). However, the preliminary outcomes of an  
75 ongoing systematic review [9] suggest that this question has not been empirically  
76 addressed to date.

77           Here we outline the protocol for an experiment designed to address the  
78 sowing vs. planting dilemma and identify the drivers of differences in effects at a  
79 continental scale. It will be conducted at multiple sites across Eurasia. The  
80 experiment will aim at: i) providing continental-scale evidence on the balance  
81 between seeding and planting, ii) testing whether this balance depends on  
82 species choice, and iii) assessing whether climatic conditions and soil  
83 characteristics interact with species traits to explain heterogeneity across sites.  
84 The experiment, which will begin in autumn 2021, has been discussed in the  
85 PEN-CAFoRR Cost action (<http://www.pen-caforr.org/>) and it has received  
86 widespread support. Overall, the study shall produce knowledge for improving  
87 forest and agroforestry ecosystem restoration.

88

## 89 **Materials and Methods**

90

### 91 **Target intervention and species**

92 We will test the effect of revegetation through direct seeding in the field vs.  
93 planting of seedlings previously grown in containers in the nursery. The  
94 experiment will encompass any local oak (*Quercus*) species. The selection of this  
95 widespread genus aims to promote broad participation and flexibility in the  
96 selection of native species with local seed sources, testing the effect of  
97 revegetation method across oak phylogeny, and addressing the seeding vs.  
98 planting dilemma for an ecologically relevant genus.

99

### 100 **Overall experimental design**

101 The experiment will consist of multiple sites (in the dozens) across Europe (yet  
102 open to potential sites across Eurasia; Fig. 1). Sites will be analogous to a “study”

103 in meta-analysis, as each site will produce effect sizes [10]. In each site, we will  
104 grow individuals in the field of one or more oak species through both seeding and  
105 planting. There will be variability across sites in species, climate, and soil  
106 characteristics, which will allow assessing the interaction of species and  
107 environmental parameters with the target intervention (revegetation method). We  
108 aim at minimizing additional heterogeneity by strictly following this protocol across  
109 all sites.

110

111 **Figure 1.** Study design. Across Eurasia, multiple sites will be established by voluntary participants  
112 (marks on the map). Each site will encompass at least 8 plots, which constitute 4 replicates of 2  
113 revegetation methods (S = sowing, P = planting). Each plot will contain 9 plant-points with a target  
114 number of one sown or planted individual. A site may contain more species, in which case the  
115 number of plots would be 8 x the number of species. The map shows the location of the institutions  
116 of researchers who have shown interest in participating as of 23 July 2021; the updated map can  
117 be found [here](#).

118

119 The study has two key components: (1) the establishment and monitoring of  
120 sites by participants, including the commitment to produce certain deliverables,  
121 and (2) the coordination of the experiment and data analyses by the organizers  
122 (Fig. 2).

123

124 **Figure 2.** Schematic representation of the experiment. The activities to be conducted grouped by  
125 those to be conducted by each participant and those for the organizers. The deliverables in the  
126 rectangular boxes will be sent to, and processed by, the organizing team at the University of  
127 Granada. \*Dried plants may be posted at the end of the experiment for chemical analysis in case  
128 of availability of additional funding.

129

130

131 **Procedure for participants at each site**

132 Participants should register their interest in participating in the experiment no later  
133 than October 2021 through the following link:  
134 [https://docs.google.com/forms/d/19jPO56rHUpi0GjCS7WYp2U3Zdly\\_SSKKgew](https://docs.google.com/forms/d/19jPO56rHUpi0GjCS7WYp2U3Zdly_SSKKgew)  
135 [OtjwwBu0/edit](https://docs.google.com/forms/d/19jPO56rHUpi0GjCS7WYp2U3Zdly_SSKKgew/edit). As of 22 July 2021, 48 respondents have filled this form, who  
136 would establish a total of 36 sites (as some sites would be established by more  
137 than one participant).

138

139 *Site design*

140 Each site will contain 8 plots of 1.5 x 1.5 m per species (with a minimum of 1  
141 species), each of which will contain 9 plant-points with either sown or planted  
142 seedlings (8 plots x 9 plants = target number of 72 plants per species; Fig. 1 &  
143 3). These 8 plots will comprise 4 replicates of each of the two revegetation  
144 methods. To obtain the target number of plants, a higher number (72) will be  
145 cultivated in the nursery and an excess of individuals (also 72) will be sown in the  
146 field (two acorns per plant-point). The total number of plots per site will thus result  
147 from multiplying 8 plots by the number of species (see Fig. 3 for an example with  
148 two species).

149

150 **Figure 3.** Design of a site of irregular shape and with two species (indicated as 1 and 2).

151

152 *Establishment of a site*

153 Each site will consist of a surface large enough to establish at least eight plots of  
154 1.5 x 1.5 m. The plots may or may not be contiguous (see Fig. 3) but they must  
155 be within approximately 100 m from each other, have similar conditions, and be  
156 at least 1 m apart from each other and 0.5 m from the edge of the site. For a site

157 with one species, the minimum size for a rectangular-shaped site would thus be  
158 5 x 10 m (Fig. 1). The allocation of revegetation method and species to each plot  
159 will be made randomly at each site. Each site must meet the following conditions:

- 160 ● Sites must be located in an open area. Abandoned fields, clearcuts, burnt  
161 areas, cleared windthrows, and other open areas are allowed. However,  
162 highly degraded areas or sites with heavily altered soil, such as roadsides,  
163 mines, and polluted sites, will not be considered. The conditions of the site  
164 (soil type, bedrock, elevation, aspect, etc.) should be representative of the  
165 area (e.g. avoid selecting a patch of rare bedrock or the top of the highest  
166 mountain of the region).
- 167 ● The site should be as flat as possible, with a maximum slope of ca. 10%.  
168 Flat terraces on an otherwise steeper mountain side are allowed.
- 169 ● There should be no trees or shrubs inside each of the plots.
- 170 ● Each plot must be clearly identified and marked and will later randomly be  
171 allocated one of the combinations of revegetation method and species (in  
172 case more than one species is used).
- 173 ● Plants must be protected from herbivores, preferably through fences  
174 around the whole site, but individual protection may also be used.  
175 Insecticide may be used if necessary. The experiment will strictly run under  
176 conditions of no browsing of aerial plant tissues by animals. It is the  
177 responsibility of each participant to define how to achieve this.
- 178 ● Note that each participant is responsible for the obtention of the necessary  
179 permits to establish their site.

180

181 *Deliverable 1: Communication of the location of experimental sites and species*  
182 *choice* (deadline: October 2021)

- 183       ● The location (GPS coordinates) of sites must be registered with the project  
184           coordinators as soon as their location is defined (i.e., not necessarily when  
185           the experiment is conducted). New sites should be located as far away as  
186           possible from other already recorded sites, or cover a different set of  
187           environmental conditions. The objective is to maximize the geographic  
188           distribution of sites and avoid spatial/ environmental clusters.
- 189       ● Along with the site coordinates, the number and identity of the local oak  
190           species expected to be used should be communicated, along with a list of  
191           potential alternative species. These alternative species would be used in  
192           case of insufficient seed production, in case some species would be used  
193           in fewer than 3 sites, or under other contingencies.
- 194       ● The deadline in October aims to allow assessing the extent of participation  
195           and the possible need to add sites in particular regions or with particular  
196           species.

197

198    *Procedure for acorn collection, selection, and storage (Autumn 2021)*

199    The seeds of the local target species will be collected from local populations  
200    growing at similar elevation, aspect, and substrate than the experimental site.  
201    Upon identification of a source population, mature and healthy-looking acorns will  
202    be collected on a minimum of 10 parent trees, evenly distributed across parents  
203    (similar number of seeds from each tree). If necessary, local seeds may  
204    exceptionally be bought. To account for seed selection, the need for a  
205    germination test (see below), and seed/ seedling losses, seeds will be collected  
206    in excess, with a target of at least 500 acorns per site and species. Participants  
207    may decide to collect more in case a visual inspection suggests that a high  
208    proportion of acorns is affected by insects.

209 After collection, acorns will be selected with the flotation method [11],  
210 ~~which consists of introducing them in water and eliminating those that float.~~ A  
211 second selection of all acorns through flotation may be conducted before the time  
212 when acorns are first used for either a) seeding, b) cultivating in the nursery, or  
213 c) conducting the germination test; the resulting acorn lot shall be considered  
214 definitive. As soon as a subset of acorns is used for one of these three processes,  
215 no further non-random acorn selection shall be conducted.

216 The selected acorns will be stored in zip polyethylene plastic bags with a  
217 thickness of no more than 75  $\mu\text{m}$ , and these will be placed in a refrigerator  
218 between 1 and 4°C. Before storage the surface of the acorns must be dried by  
219 leaving the acorns to dry out for 24h. Subsequent handling of acorns will be done  
220 as swiftly as possible to minimize the risk of seed desiccation or fungal attack  
221 during storage. Acorns should be inspected periodically during storage to detect  
222 possible rottenness. Bags should not be stacked while stored to facilitate gas  
223 exchange.

224

225 *Deliverable 2: seeds and soil samples* (deadline: November 2021)

226 The participants will post one parcel per site to the organizing team, containing:

- 227 ● 150 acorns per species. They will be placed inside the afore-mentioned  
228 polyethylene zip bags and cushioned to avoid physical damage.
- 229 ● A composite soil sample from the experimental site. To produce the  
230 sample, three holes of 20 cm depth will be dug at different points within  
231 the site. The soil from the three samples will be thoroughly mixed, and 1  
232 kg of the remaining mixture will be placed in a plastic bag. The sample will  
233 be allowed to dry under indoor conditions for 1 week previous to posting  
234 it.

235

236 The parcel will be sent through an express courier service to avoid the  
237 deterioration of the soil or the loss of viability of the acorns during transportation.

238 Participants are kindly asked to cover the cost of the courier service, yet in case  
239 this was impossible, please contact the organizing team. The address is:

240 Alexandro B Leverkus

241 Departamento de Ecología, Facultad de Ciencias

242 Campus Fuentenueva s/n

243 18071 Granada, Spain

244

245 *Soil preparation* (autumn 2021–winter 2022 for seeding; winter-spring 2023 for  
246 planting)

247 Soil preparation for both revegetation methods will consist of the clearing of  
248 vegetation inside the plots and the excavation of a 40 x 40 x 40 cm hole for each  
249 seedling or group of seeds. This can be achieved either manually or mechanically  
250 as long as these dimensions are reached and not exceeded. The holes for  
251 seeding will be excavated in the first year (i.e., right before seeding) and those  
252 for the planting treatment in the following year (i.e., right before planting). In case  
253 of mechanical soil preparation, the spatial arrangement of the experiment must  
254 allow the machinery to access the planting plots in the second year without  
255 disturbing the plots that were seeded in the first year. Each plant-point will be  
256 marked to identify individual plants.

257

258 *Procedure for direct seeding* (Autumn 2021 or Winter 2022)

259 Before seeding, the acorns will be soaked in water for 24 h. The previously  
260 excavated soil will be placed back in the hole, and seeds will be placed at ~3-4



261 cm depth within an acorn protector (see below for details). To secure a sufficient  
262 number of seedlings, two acorns will be placed in each seed-point, each with an  
263 individual protector. The date of seeding will be selected based on local best  
264 practice but, among the range of possible dates, the earliest will be preferred.  
265 Either on the same or on the following day, 2L of water will be applied to each  
266 seed-point.

267         Seeds will be placed in the ground inside of seed protectors to avoid their  
268 predation by small animals. We will use commercial seed protectors (*seed*  
269 *shelters* [12,13]), which will be posted by the organizers to all participating sites.  
270 The protectors consist of two truncated pyramids joined at their larger opening;  
271 the stem and root can exit through the small openings at the top and bottom but  
272 the dimensions of these holes preclude access to rodents (Fig. 4). The two halves  
273 are completely filled with local soil and one acorn in the middle prior assembly of  
274 the two units, taking care that they are full of soil. The complete device is then  
275 placed in the ground, with the upper opening about 1 cm beneath the surface.  
276 The material currently under commercialization is not biodegradable, so the seed  
277 shelters may need to be removed at the end of the experiment.

278

279 **Figure 4.** Seed shelters to be used to protect acorns from small vertebrate predators. Before  
280 assembling the two units, they are filled with local soil and an acorn is placed in the middle.  
281 Reproduced from [12]; permission from Springer-Nature pending.

282

283 *Procedure for nursery cultivation (Winter 2022- Winter/Spring 2023)*

284 At a date close to that of seeding in the field (+/- 2 weeks), nursery cultivation will  
285 be initiated. Cultivation may be conducted in a nursery managed by participants'  
286 research institution or at any other nursery that is publicly or privately owned. The

287 number of seedlings to be cultivated will be the same as the number of acorns to  
288 be sown in the field, which is twice the target number of plants (72 individuals per  
289 species and method).

290 The seedlings will be grown in common plastic containers of 300 (250–  
291 300) mL and ~15 cm depth, at a density of <math><350\text{ plants m}^{-2}</math>. The substrate to be  
292 used will consist of a mixture of ~~blonde~~ peat and vermiculite at a proportion of  
293 3:1. Prior to this process, acorns will be soaked in water for 24 h. Once a container  
294 is filled with substrate, one acorn will be placed as horizontally as possible on the  
295 surface and gently pushed down to a depth of approximately 1 cm. It will then be  
296 covered and the surface above will be gently compacted. Watering will be applied  
297 on the same day.

298 The seedlings will be grown outdoors under full sunlight for as long as  
299 possible (taking care to protect the containers from potential acorn predators such  
300 as rodents and birds). However, seedlings should be placed in a greenhouse for  
301 the necessary time in winter. Watering will be applied on demand to ensure an  
302 optimal growth. 

303

#### 304 *Procedure for outplanting* (Winter/ Spring '23)

305 At one year of age, the containerized seedlings will be outplanted in the field and  
306 placed in the previously excavated holes (see *Seedling selection*, below). This  
307 will be done at the time of the year that is optimal given local best practice but  
308 preferentially in winter or early spring; hole digging should occur shortly before.  
309 Preferentially, seedlings grown close to each other in the nursery will be placed  
310 in different field plots (to avoid seedlings that had similar light or water conditions  
311 in the nursery being placed together in a field plot). The excavated soil will be  
312 used to re-fill the part of the hole remaining empty and gently pushed down to

313 avoid remaining holes. Either on the same or on the following day, 2L of water  
314 will be applied to each plant. The person(s) conducting the sowing should be the  
315 same doing the outplanting to ensure similarity in the methods.

316

### 317 *Seedling selection*

318 As indicated before, both the seeding and the planting treatments will start with  
319 twice the target number of individuals to ensure that sufficient plants are present  
320 for the actual experiment. As a consequence, half of the individuals will need to  
321 be selected to be part of the experiment. This selection will be done at the time  
322 of the outplanting of nursery seedlings under the following procedure:

- 323 ● Seeding treatment: In those plant-points in which the two seeded acorns  
324 produced an emerged seedling, the tallest will be kept and the shortest will  
325 be carefully removed.
- 326 ● Planting treatment: Among pairs of seedlings growing next to each other,  
327 the tallest will be used for outplanting and the shortest will be kept in the  
328 container.

329

330 The size of all seedlings –both seeded and planted individuals– will be measured  
331 at the time of transplanting (see *Measurements*, below). One month after  
332 planting, mortality due to transplant shock will be assessed, and dead nursery-  
333 grown seedlings will be replaced with the “extra” seedlings from the nursery,  
334 following the same procedure. The number of replaced seedlings will be noted  
335 and they will be measured.

336

### 337 *Site maintenance*

338 Herbs growing on the site need to be removed periodically. The frequency and  
339 timing of weeding must be decided according to the amount of herbs at each site.  
340 Weeding should occur on the same date for the whole site, no later than the time  
341 when herbs have grown to cover ~80% of the surface of the plots. This  
342 maintenance should begin in early 2022, when the seedlings are emerging from  
343 seeded acorns.

344

345 Deliverable 3: Data (various timings)

346 Participants are required to submit data measured at the individual plant level.  
347 For this, a spreadsheet will be prepared by the organizing team and sent to the  
348 participants at each measurement time. In the spreadsheet, each row will  
349 constitute one individual plant, which in every case will be identified through four  
350 columns: site name, treatment (sown or planted), plot number (1–4), and plant-  
351 point number (1–9). The remaining columns will constitute the measured  
352 responses, which may include the following at the given points in time:

- 353 1. After the emergence of sown seedlings, in mid-2022. Number of seedlings  
354 emerged at each plant-point (0, 1 or 2).
- 355 2. Time of outplanting of nursery seedlings, in early 2023. For seeding plots:  
356 number of live seedlings remaining at each plant-point (0, 1 or 2). The rest  
357 of data will be measured on **all seedlings**: stem height (from the ground  
358 level to the stem apex), and stem diameter (in two perpendicular  
359 measurements). In case more than one stem emerged from the seed  
360 shelter, the height and diameter of all living stems will be measured. The  
361 same measurements will be made for replacement seedlings at the time  
362 of replacement (see the end of the section *seedling selection*, above).

- 363 3. After the first growing season. After summer 2023, mortality will be  
364 assessed, as well as stem height and diameter (as described above).
- 365 4. After the first winter. After winter 2024, mortality will be assessed.
- 366 5. After the second growing season. After summer 2024, mortality will be  
367 assessed, as well as stem height and diameter (as described above).
- 368 Aerial wet and dry biomass will be measured on either all individuals or a  
369 subset (depending on the proportion of survivors). For this, the seedlings  
370 will be cut at the base, weighed in the field with a scale, then oven-dried  
371 (minimum 3 days at 60°C) and weighed again.
- 372 6. More measurements on plant performance or other *ecological* variables  
373 are possible (including chemical analyses of the harvested seedlings) if  
374 funding is made available or if some person from the network takes the  
375 initiative.

376

377 *Key material requirements for each participant*

378 The key material needs identified required for each participating site include the  
379 following:

- 380 ● Local source of acorns of all target species
- 381 ● Site for planting; it must be accessible, protected against herbivores,  
382 and secure
- 383 ● Greenhouse or a nursery facility for plant cultivation
- 384 ● Transport to the field including for containerized seedlings
- 385 ● Materials for digging, marking plots and tagging plants
- 386 ● Oven
- 387 ● Scales: laboratory and field
- 388 ● Ruler and calliper

- 389 • Computer, printer, writing materials
- 390 • Desired: funding for courier service

391

## 392 **Procedure for the organizers**

### 393 *Dissemination*

394 The experiment was initially proposed to be conducted as part of the PEN-  
395 CAFoRR COST action, of which all the authors of this protocol are members  
396 and/or leaders of the action or of particular work packages. Following a positive  
397 initial response to the idea, more specific information has been circulated among  
398 all action members, and a survey was sent for participants to indicate willingness  
399 to participate and the geographic location of potential sites. The survey was  
400 circulated among participants' colleagues until, at present, 48 participants have  
401 registered. Two brochures with information have been sent so far (see  
402 Supplements 1 & 2). For visual identity, a logo has been created (**Fig. 5**).

403 Participant recruitment is still open at the time of submission of this  
404 protocol. New brochures before the beginning of the experiment will be sent,  
405 aiming to steadily build up information about the experiment and to set the timing  
406 of meetings to solve final questions in early autumn, by when this protocol will be  
407 provided to all participants. A website is being created, which will contain relevant  
408 updates, and it will be hosted at the website of the Department of Ecology,  
409 University of Granada.

410

411 **Figure 5.** Logo for the experiment.

412

413 *Sending and receiving materials*

414 In early autumn 2021, the organizing team will post parcels with sufficient seed  
415 shelters for the experiment to all participating sites. In late autumn, parcels will  
416 be received with soil samples and seeds for further handling; see below.

417

#### 418 *Germination test* (Autumn 2021 – Spring 2022)

419 From each seed lot, 150 acorns will be sent per mail to the study coordination  
420 site at the University of Granada. Upon reception, they will be stored under  
421 refrigeration. At the end of November 2021, a germination test will be initiated  
422 with 100 individuals per species and site, with the aim of being able to differentiate  
423 emergence percentage in the field from **germination probability**. The test will be  
424 conducted in a **greenhouse**, where all acorns will be placed under optimal  
425 conditions for germination **and the percentage of non-germinated acorns will be**  
426 **assessed by the end of spring 2022**. Prior to the test, all acorns will be soaked in  
427 water for 24 h. The remaining 50 acorns per species and site will be oven-dried  
428 and their mass will be measured.

429

#### 430 *Soil analyses*

431 One composite soil sample will be sent to Granada from each site and be  
432 processed to assess basic soil properties including granulometry, cation  
433 exchange capacity, water holding capacity, and the content of key nutrients such  
434 as P and N as well as C. These analyses will prospectively be conducted at the  
435 laboratory for soil science of the University of Granada. The data will be used to  
436 explore the extent to which the response of seedlings to revegetation method can  
437 be explained by differences in soil type.

438

#### 439 *Statistical analyses*

440 The data will constitute a multi-site study suitable for meta-analysis [14]. Each  
441 measurement on each species at each site will produce one effect size. The  
442 significance of an overall effect size of revegetation method on various measures  
443 of seedling performance will be tested. In case of significant heterogeneity in  
444 effect sizes among studies, which is expected, the effect of covariates (variables  
445 that differ between data points, including soil parameters, mean site-level  
446 temperature to be obtained from [www.worldclim.com](http://www.worldclim.com), species, and mean seed  
447 mass from the lot) will be modelled with mixed-effects meta-regression. The  
448 model will include site as a random effect, as well as the phylogenetic relatedness  
449 of species [e.g., [15]], which will be built with the V.PhyloMaker R package [16].

450

451 The complete timeline for the experiment is indicated in Figure 6.

452

453

454 **Figure 6.** Timeline for the experiment. The exact timing of seed collection, seeding, outplanting,  
455 weeding, and measurements will need adjustment to local phenology. \*Weeding will be done  
456 when >80% of the plots are covered by herbs.

457

## 458 Discussion

459

### 460 *Control of bias*

461 One key aspect of comparing direct seeding and seedling planting as  
462 revegetation methods is to avoid bias (for a discussion, see [9]). In many studies,  
463 bias results from comparing plots containing outplanted nursery seedlings with  
464 plots where direct seeding was conducted at the same time, and therefore the  
465 plants are younger in the latter plots, and seeds do not come from the same



466 batch. In our experiment, the seedlings under both revegetation methods at each  
467 site will be produced from the same seed batches and grown at the same time.  
468 Seeds will be sown in the field in the same year as in the nursery, and the nursery-  
469 grown seedlings will later be outplanted to the field, thereby producing similarly-  
470 aged “siblings” grown under the two different methods. This approach may  
471 introduce a different source of bias, namely that of the conditions of the year of  
472 outplanting differing across the two revegetation methods. This would be  
473 problematic for studies based on a single study site, yet as the weather-at-  
474 outplanting effect is expected to be random across sites, there is no expectation  
475 that this would introduce systematic bias in the data and it can thus properly be  
476 dealt with using site-specific random effects in statistical analyses [10,17], as we  
477 plan to do.

478

#### 479 *Potential for additional treatments or measurements*

480 The conditions outlined in this document are a minimum that is required for each  
481 site and they are sufficient for participation in the experiment. Additional  
482 treatments, measurements, etc., as well as the possible continuation of the  
483 experiment beyond the indicated timeframes, may be proposed by participants to  
484 the project coordinators. Upon agreement, proposals will be passed to the  
485 participants so that each can decide on whether to implement the new protocols.

486

#### 487 *Publications and authorship*

488 The first publication in a scientific journal resulting from the data of this  
489 experiment will be led by the coordinators of this initiative. The data will be made  
490 publicly available in an open access repository along with the first publication, so  
491 anyone will be able to access the dataset and make additional use of it. Requests

492 for additional use of the data prior to the first publication would be assessed by  
493 the coordinators. In general, single authors can consider using the data from  
494 individual sites, yet not simultaneously using data from more than one site for  
495 publications outside of the project framework. This has the objective of  
496 maximizing both the scientific outcome of the experiment as a whole and  
497 enhancing the academic output for all participants.

498 All persons who set up a site according to the protocol and produce all  
499 deliverables in proper form and time will be invited to co-author the resulting  
500 publication(s). The author list will consist of one person per species and site  
501 (strictly not more), with the possible addition of people who provide considerable  
502 assistance in other aspects of the project (for instance in soil analyses,  
503 germination test, data handling, considerable intellectual input, etc.). For co-  
504 authorship, it will be further required that every author at least reads the  
505 manuscript and explicitly approves its submission.

506

507 Participation in the study implies the acceptance of all the conditions  
508 established in this protocol.

509

510

## 511 **Author contributions**

512 ABL conceived and designed the study and drafted this protocol. EA and ML  
513 contributed to the initial idea. LL prepared all the figures and brochures. All  
514 authors contributed intellectually to the development of this protocol, revised the  
515 text, and approved its final version.

516

## 517 Acknowledgements

518 We are grateful to the participants of the PEN-CAFORR COST action, who have  
519 so far warmly welcomed this experiment by signing up to establishing local sites,  
520 and we look forward to fulfilling this collaboration. We thank the reviewers of this  
521 protocol in advance for suggestions on improving it.

522

## 523 References

- 524 1. Cernansky R. How to rebuild a forest. *Nature*. 2018;560: 542–544.
- 525 2. Nave LE, Domke GM, Hofmeister KL, Mishra U, Perry CH, Walters BF, et  
526 al. Reforestation can sequester two petagrams of carbon in US topsoils in  
527 a century. *Proc Natl Acad Sci*. 2018;115: 201719685.  
528 doi:10.1073/pnas.1719685115
- 529 3. Chazdon RL. Beyond deforestation: Restoring forests and ecosystem  
530 services on degraded lands. *Science* (80- ). 2008;320: 1458–1460.  
531 doi:10.1126/science.1155365
- 532 4. Jones HP, Murphy SD. Answering the call for #GenerationRestoration:  
533 The Special Feature from the Society for Ecological Restoration and  
534 British Ecological Society to meet the challenges under the United  
535 Nations Decade on Ecosystem Restoration. *Restor Ecol*. 2021;29:  
536 e13343. doi:10.1111/rec.13343
- 537 5. Hartig GL. *Anweisung für Taxation und Beschreibung der Forste*. 4th ed.  
538 Giessen: Bey Georg Friedrich Heyer; 1819.
- 539 6. Löff M, Castro J, Engman M, Leverkus AB, Madsen P, Reque JA, et al.  
540 Tamm Review: Direct seeding to restore oak (*Quercus* spp.) forests and  
541 woodlands. *For Ecol Manage*. Elsevier; 2019;448: 474–489.

- 542 doi:10.1016/j.foreco.2019.06.032
- 543 7. Palma AC, Laurance SGWW. A review of the use of direct seeding and  
544 seedling plantings in restoration: What do we know and where should we  
545 go? *Appl Veg Sci.* 2015;18: 561–568. doi:10.1111/avsc.12173
- 546 8. Tsakalidimi M, Tsitsoni T, Ganatsas P, Zagas T. A comparison of root  
547 architecture and shoot morphology between naturally regenerated and  
548 container-grown seedlings of *Quercus ilex*. *Plant Soil.* 2009;324: 103–  
549 113. doi:10.1007/s11104-009-9974-4
- 550 9. Leverkus AB, Lázaro González A, Andivia E, Castro J, Jiménez MN,  
551 Navarro FB. Seeding or planting to revegetate the world's degraded land:  
552 systematic review and experimentation to address methodological issues.  
553 *Restor Ecol.* 2021;In press. doi:10.1111/rec.13372
- 554 10. Koricheva J, Gurevitch J, Mengersen K, editors. *Handbook of Meta-*  
555 *analysis in Ecology and Evolution.* Princeton and Oxford: Princeton  
556 University Press; 2013.
- 557 11. Bonfil C. The effects of seed size, cotyledon reserves, and herbivory on  
558 seedling survival and growth in *Quercus rugosa* and *Q. laurina*  
559 (Fagaceae). *Am J Bot.* 1998;85: 79–87.
- 560 12. Castro J, Leverkus AB, Fuster F. A new device to foster oak forest  
561 restoration via seed sowing. *New For.* 2015;46: 919–929.  
562 doi:10.1007/s11056-015-9478-4
- 563 13. Leverkus AB, Rojo M, Castro J. Habitat complexity and individual acorn  
564 protectors enhance the post-fire restoration of oak forests via seed  
565 sowing. *Ecol Eng. Elsevier B.V.*; 2015;83: 276–280.  
566 doi:10.1016/j.ecoleng.2015.06.033
- 567 14. Gurevitch J. Meta-analysis of results from multi-site studies. In: Koricheva

- 568 J, Gurevitch J, Mengersen K, editors. Handbook of Meta-analysis in  
569 Ecology and Evolution. Princeton and Oxford: Princeton University Press;  
570 2013. pp. 313–320.
- 571 15. Leverkus AB, Polo I, Baudoux C, Thorn S, Gustafsson L, Rubio de Casas  
572 R. Resilience impacts of a secondary disturbance: Meta-analysis of  
573 salvage logging effects on tree regeneration. *J Ecol.* 2021;in press.  
574 doi:10.1111/1365-2745.13581
- 575 16. Jin Y, Qian H. V. PhylMaker: an R package that can generate very large  
576 phylogenies for vascular plants. *Ecography (Cop).* 2019;42: 1353–1359.  
577 doi:10.1111/ecog.04434
- 578 17. Borenstein M, Hedges L V, Higgins JPT, Rothstein HR. Introduction to  
579 Meta-Analysis. Chichester: John Wiley & Sons; 2009.
- 580
- 581

582 **Supplementary Materials**

583 **Appendix S1**

584 First brochure, sent to all participants of the PEN-CAFoRR COST action on 1  
585 June 2021.

586

587

588 **Appendix S2**

589 Second brochure, sent on 24 June 2021 to all people who registered their  
590 interest after sending the first brochure on 1 June 2021.

591

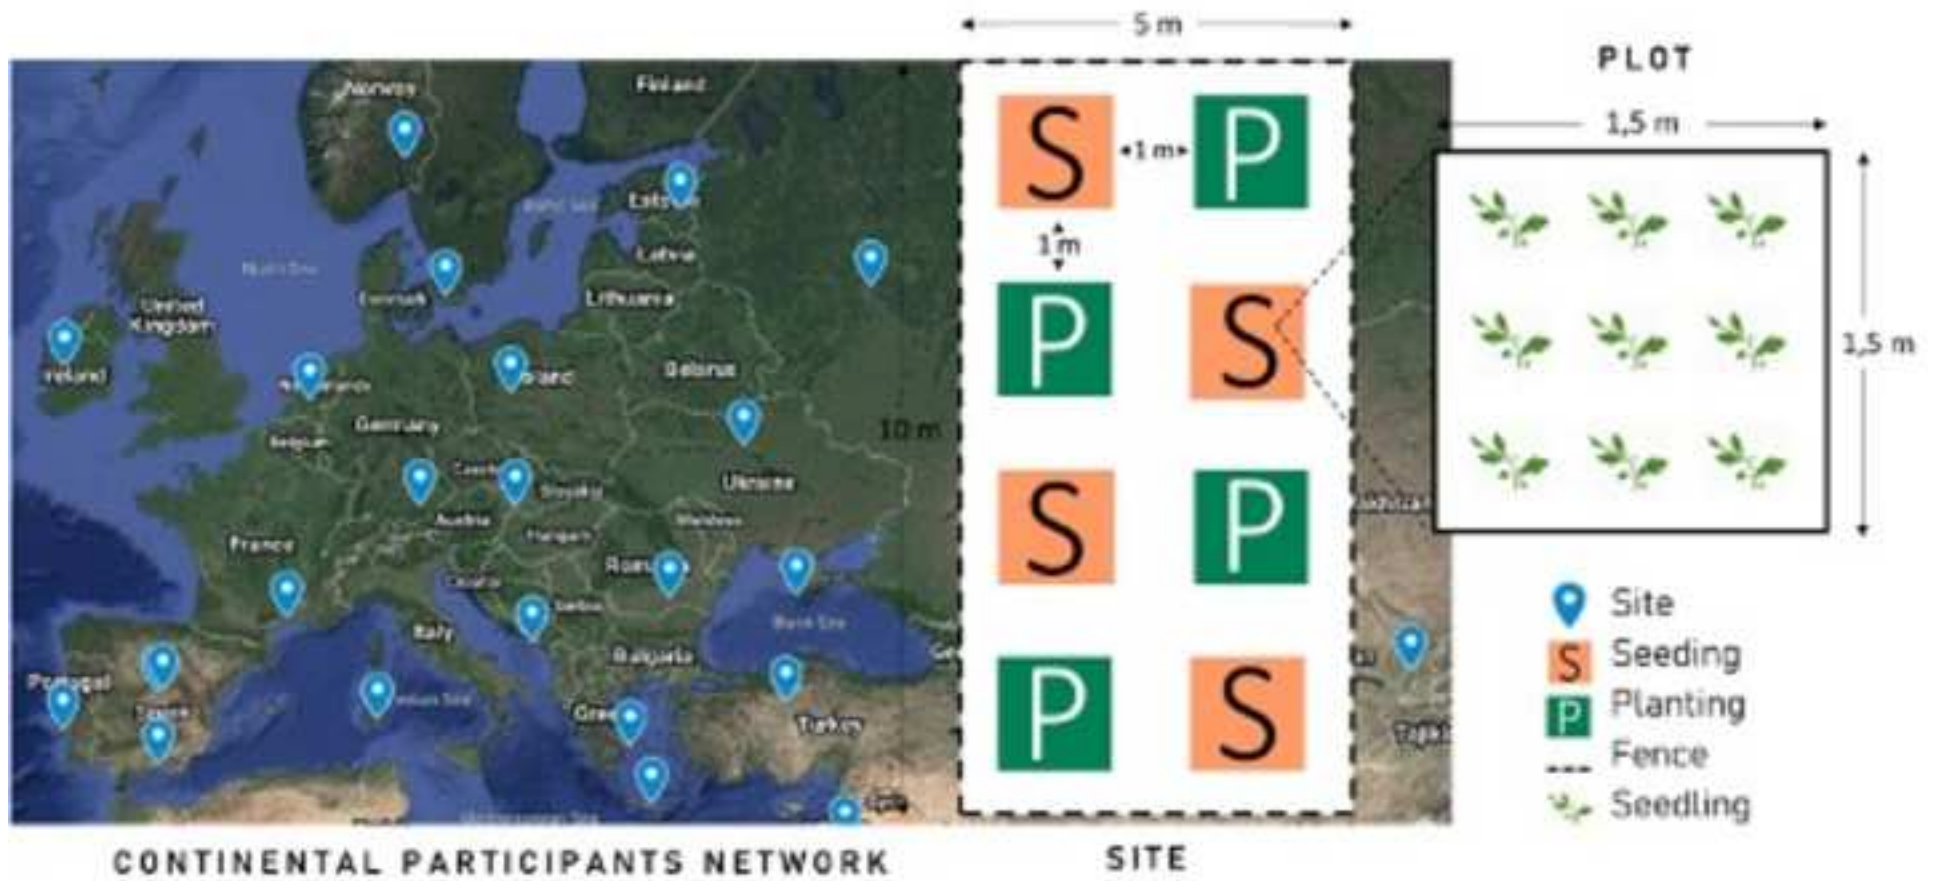

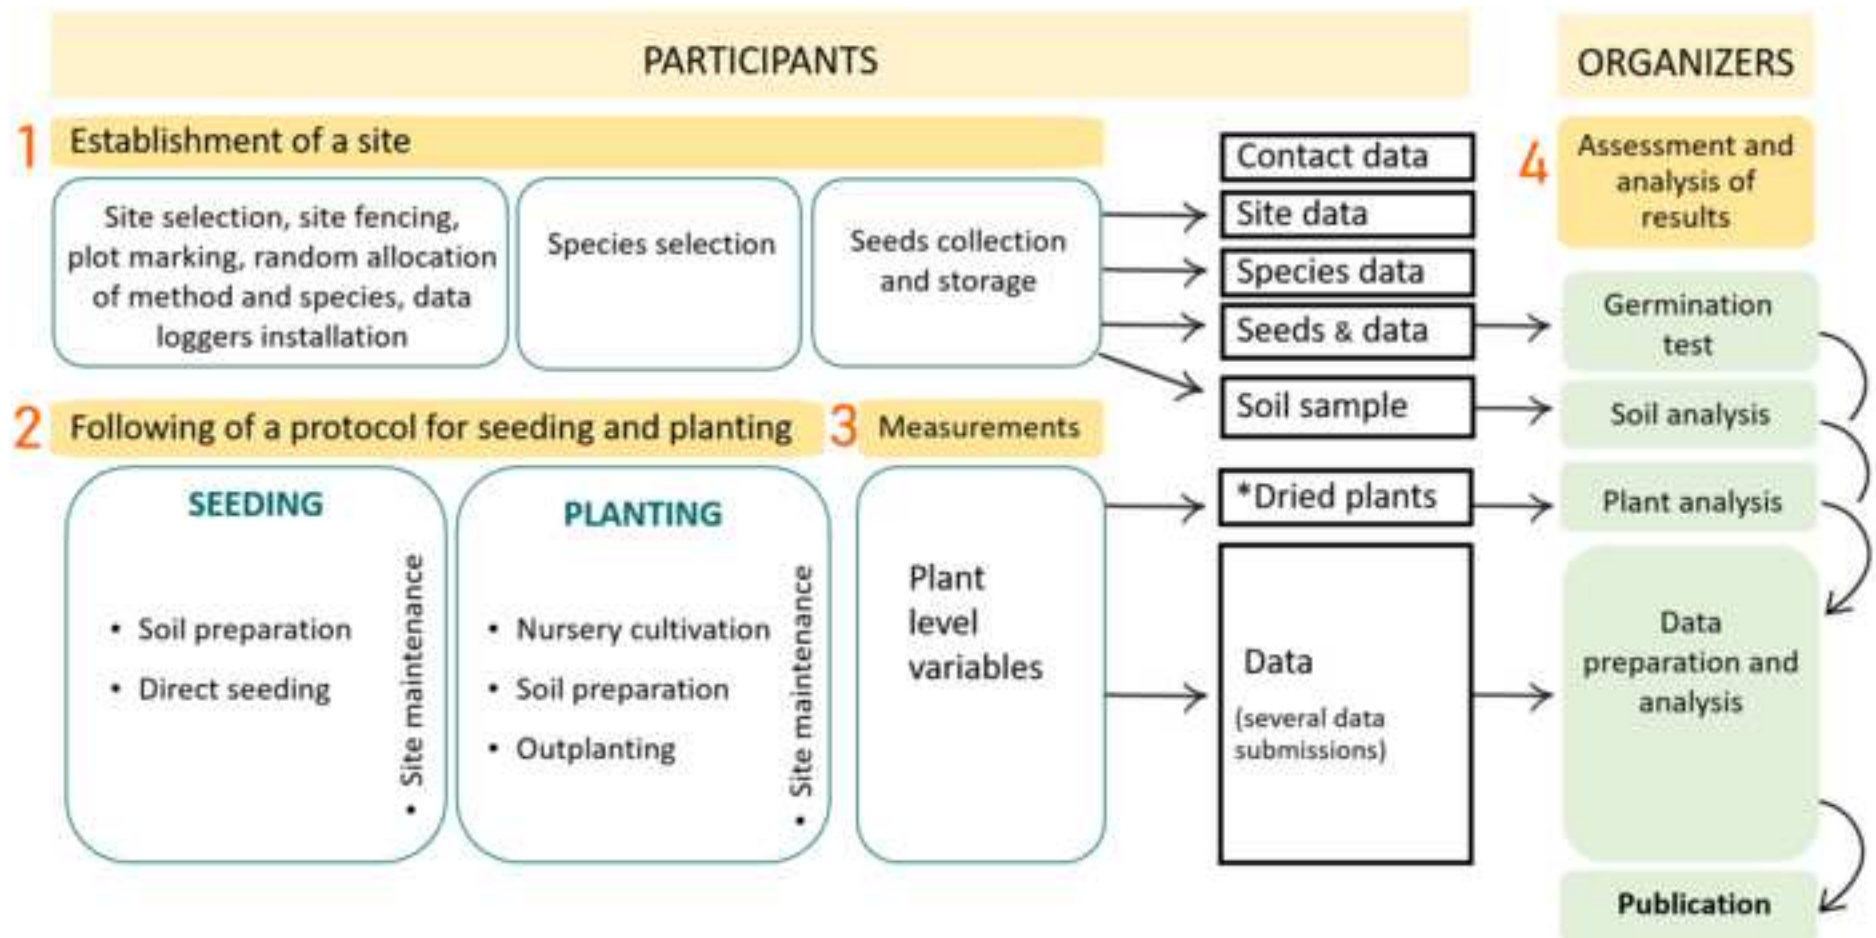



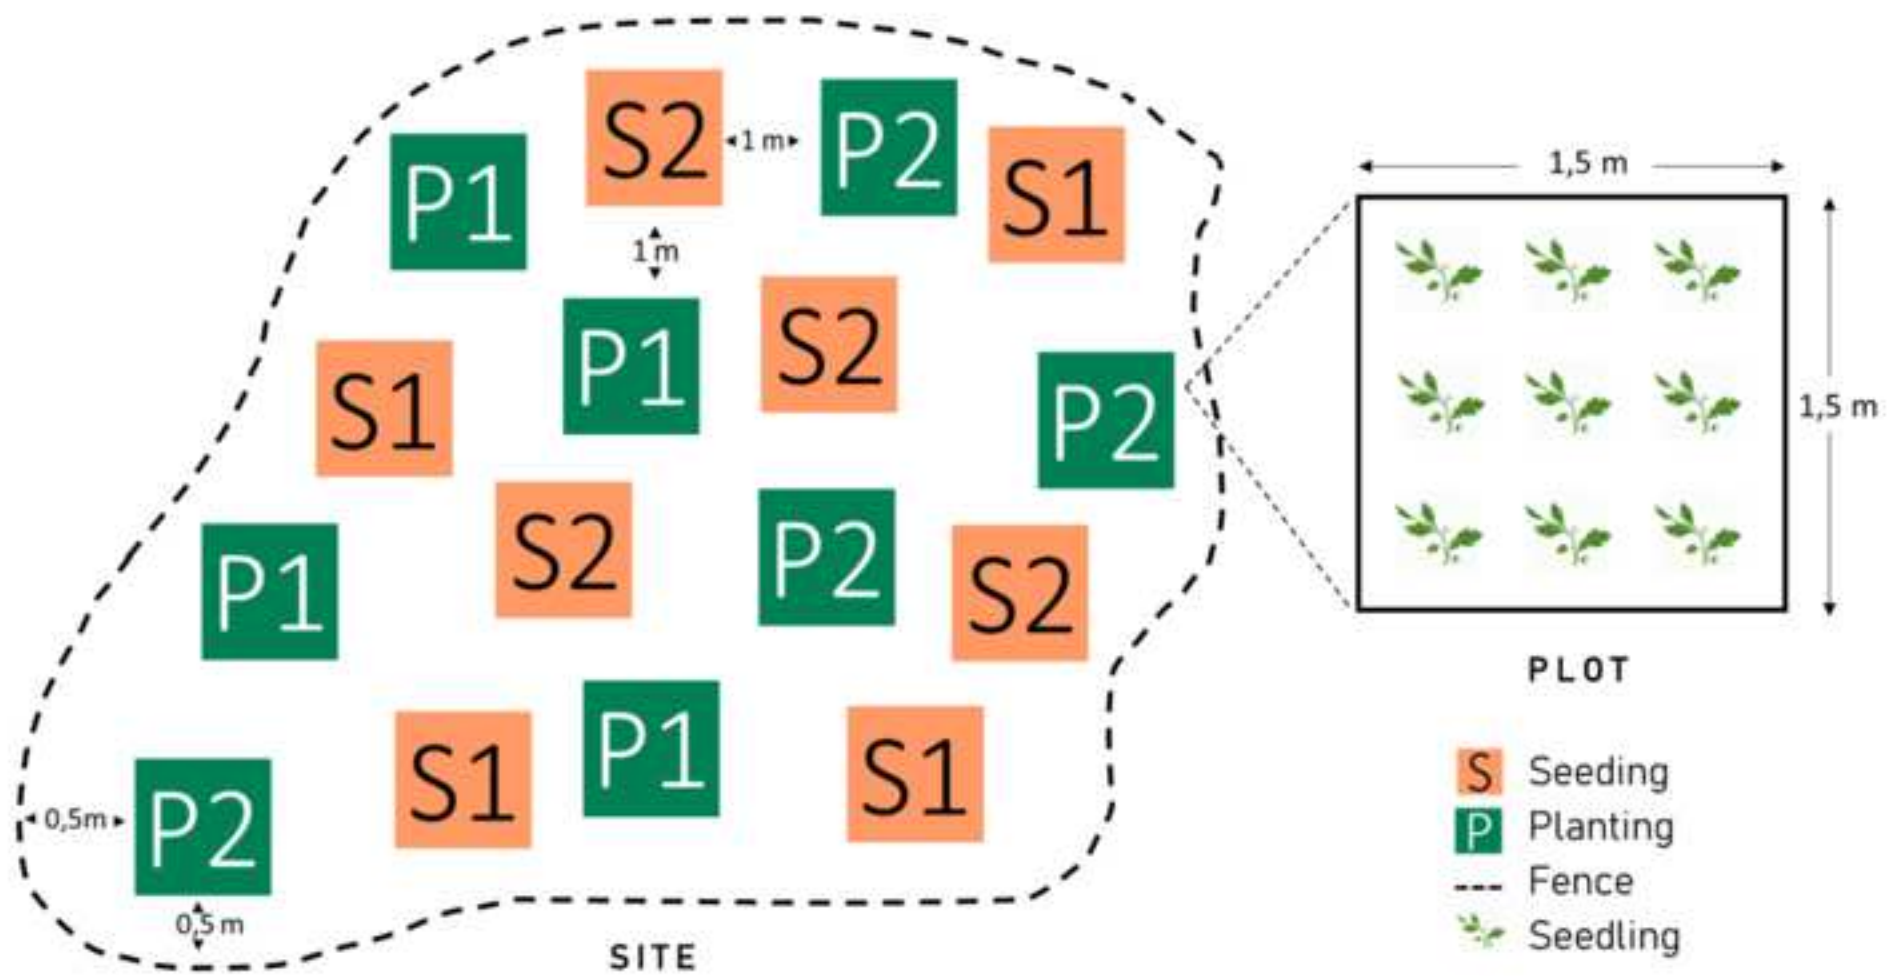

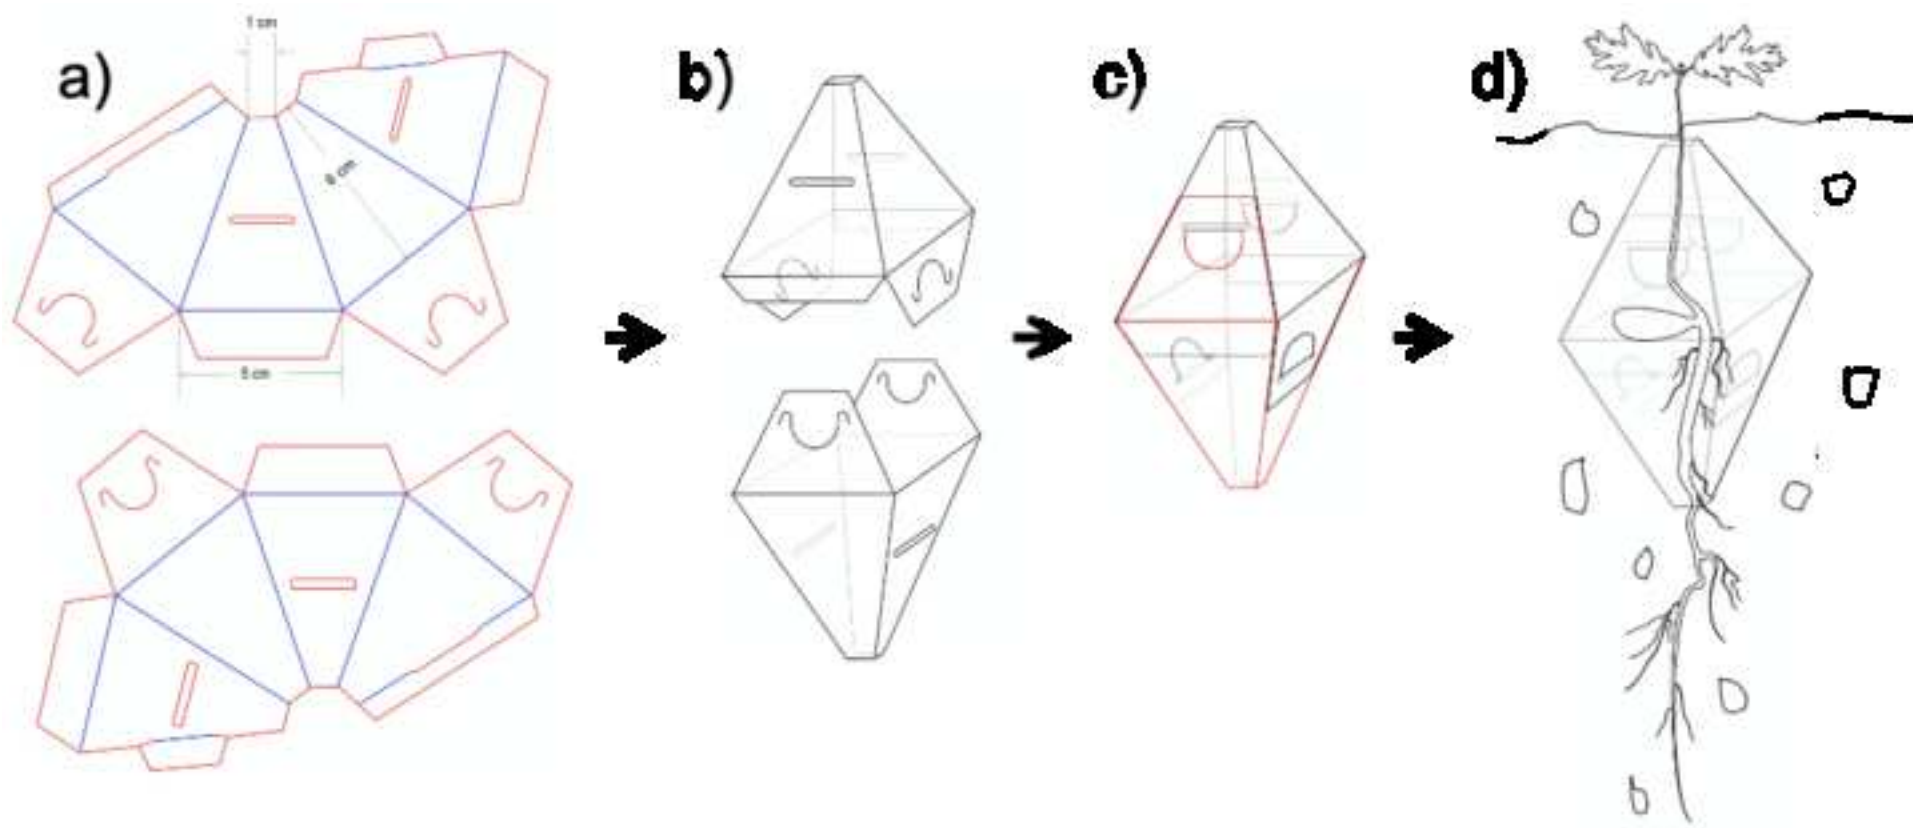

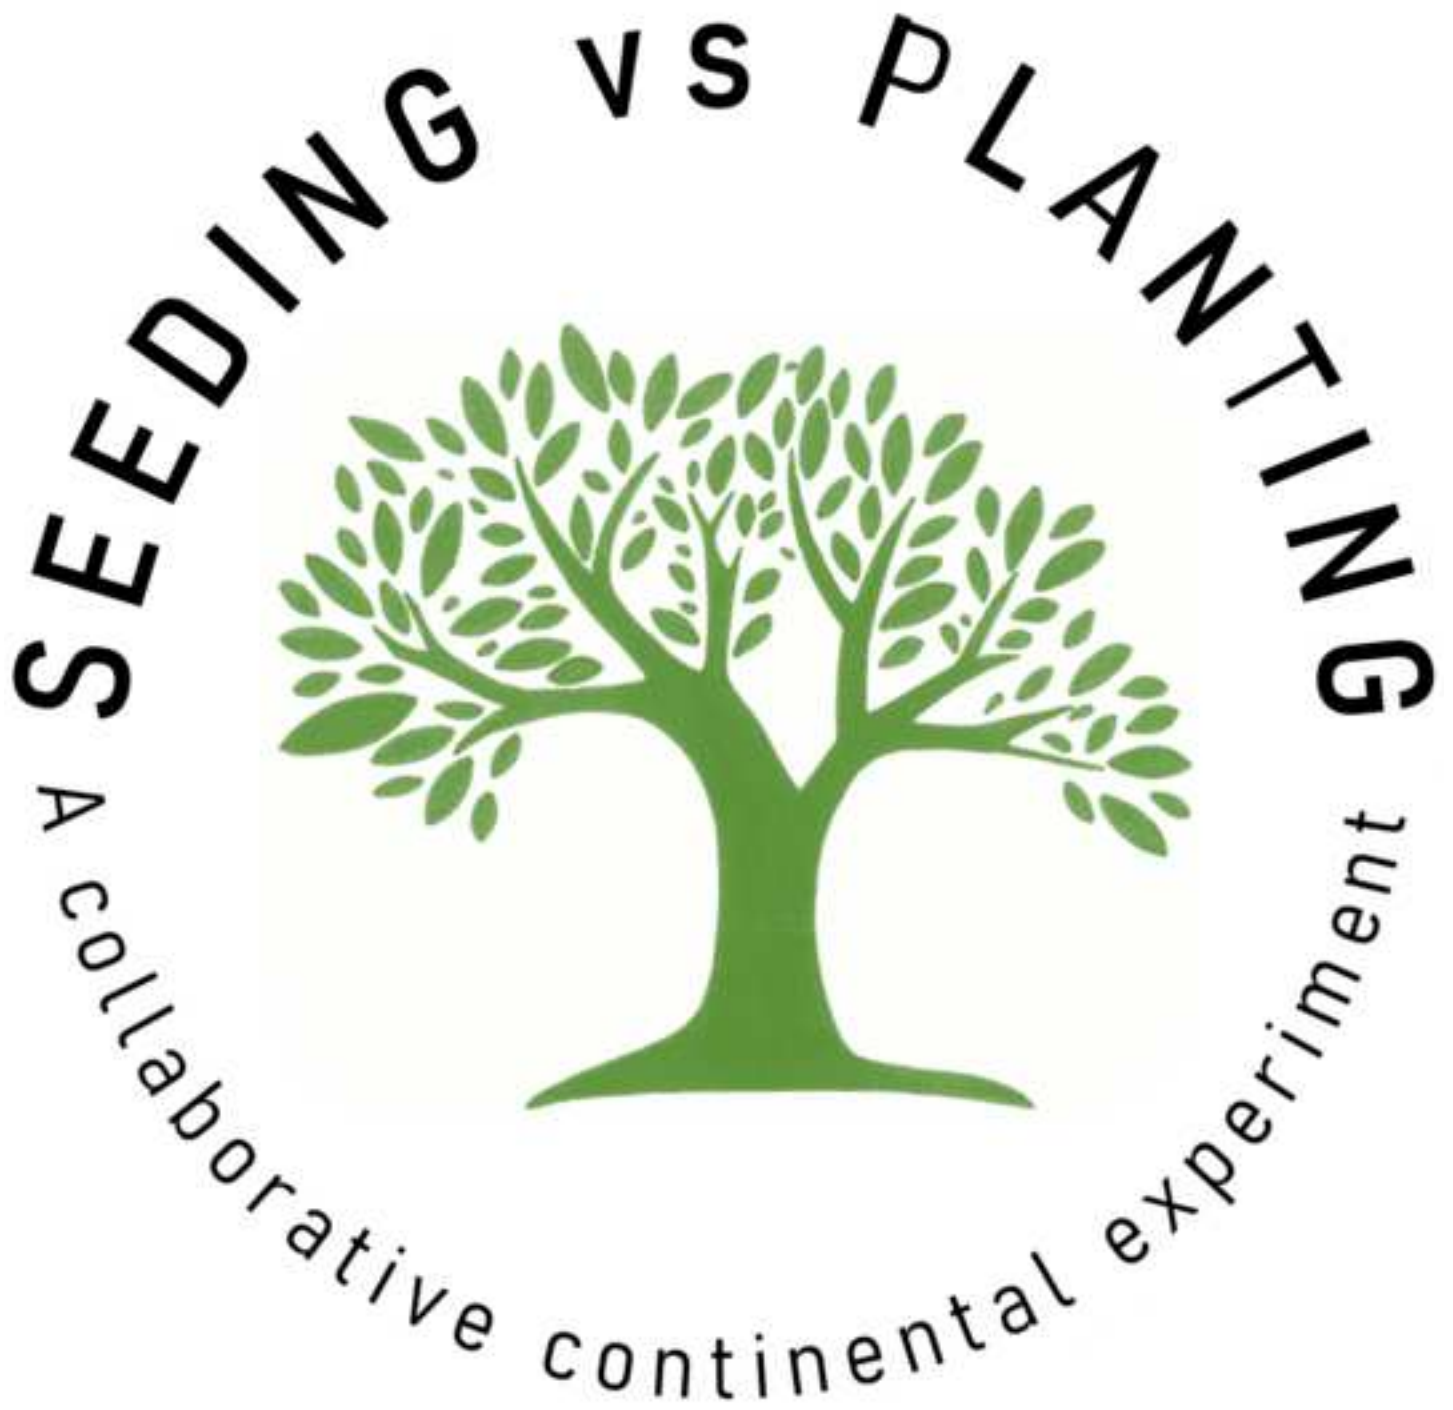

Figure 6

| Who              | Action                             | 2021                            |                                                  | 2022                            |                    |                                              |        | 2023                                                                                                    |              |                                            |              | 2024                         |          |                                            |                                 |
|------------------|------------------------------------|---------------------------------|--------------------------------------------------|---------------------------------|--------------------|----------------------------------------------|--------|---------------------------------------------------------------------------------------------------------|--------------|--------------------------------------------|--------------|------------------------------|----------|--------------------------------------------|---------------------------------|
|                  |                                    | summer                          | autumn                                           | winter                          | spring             | summer                                       | autumn | winter                                                                                                  | spring       | summer                                     | autumn       | winter                       | spring   | summer                                     | autumn                          |
| All participants | Site preparation                   |                                 | Soil preparation. Marking plots and plant-points | Weeding*                        | Weeding*           | Weeding*                                     |        | Weeding*                                                                                                | Weeding*     | Weeding*                                   |              | Weeding*                     | Weeding* | Weeding*                                   |                                 |
|                  | Seed preparation                   |                                 | Seed collection, selection, storage              |                                 |                    |                                              |        |                                                                                                         |              |                                            |              |                              |          |                                            |                                 |
|                  | Seeding                            |                                 | Seeding in the field                             |                                 | Measure emergence  |                                              |        | Initial seedling measurements                                                                           |              | Seedling measurements after growing season |              | Assess survival after winter |          | Seedling measurements after growing season |                                 |
|                  | Planting                           |                                 | Start nursery cultivation                        |                                 |                    |                                              |        | Outplanting nursery seedlings & Initial seedling measurements. Dead-seedling replacement & measurement. |              | Seedling measurements after growing season |              | Assess survival after winter |          | Seedling measurements after growing season |                                 |
|                  | Deliverables                       |                                 | Send site and species info. Post seeds and soils |                                 | Data #1            |                                              |        | Data #2                                                                                                 |              | Data #3                                    |              | Data #4                      |          | Data #5                                    | Post dry plants (to be decided) |
| Coordinators     | Germination test and soil analysis |                                 | Start of germination test                        | Soil analysis test              | End of germination |                                              |        |                                                                                                         |              |                                            |              |                              |          |                                            |                                 |
|                  | Data management                    | Attract and inform participants | Disseminate full study protocol                  |                                 |                    | Prepare emergence, soil and germination data |        |                                                                                                         | Prepare data |                                            | Prepare data |                              |          | Prepare and analyse data                   |                                 |
|                  | Write-up                           |                                 |                                                  | Write up introduction & methods |                    |                                              |        | Update introduction & methods                                                                           |              |                                            |              |                              |          | Prepare results & discussion               |                                 |

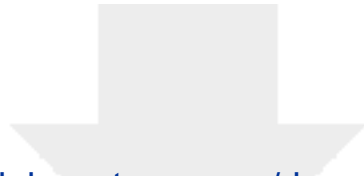

Click here to access/download  
**Supporting Information**  
Appendix S1.pdf

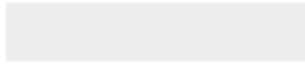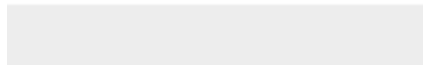



Click here to access/download  
**Supporting Information**  
Appendix S2.pdf



Supplement: pone.0259552.s006.pdf [file pone.0259552.s006.pdf]
