# Supplementary material for: Restoring oak forests through direct seeding or planting: Protocol for a continental-scale experiment
Source: PubMed Central journal article supplement (PMC8568285; doi:10.1371/journal.pone.0259552), 2021-11-04
Supplement: pone.0259552.s001.pdf [file pone.0259552.s001.pdf]

# Restoring vegetation through direct seeding or planting: A continental-scale experiment

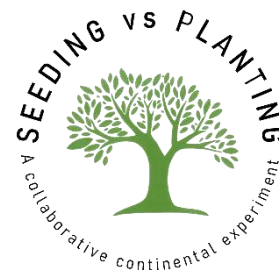

## The experiment

Collaborative field mini-experiment that explores the *seeding vs. planting* dilemma in **Quercus spp.** along environmental gradients through a [network of participants](#), aiming to contribute to knowledge for improving forest and agroforestry ecosystem restoration.

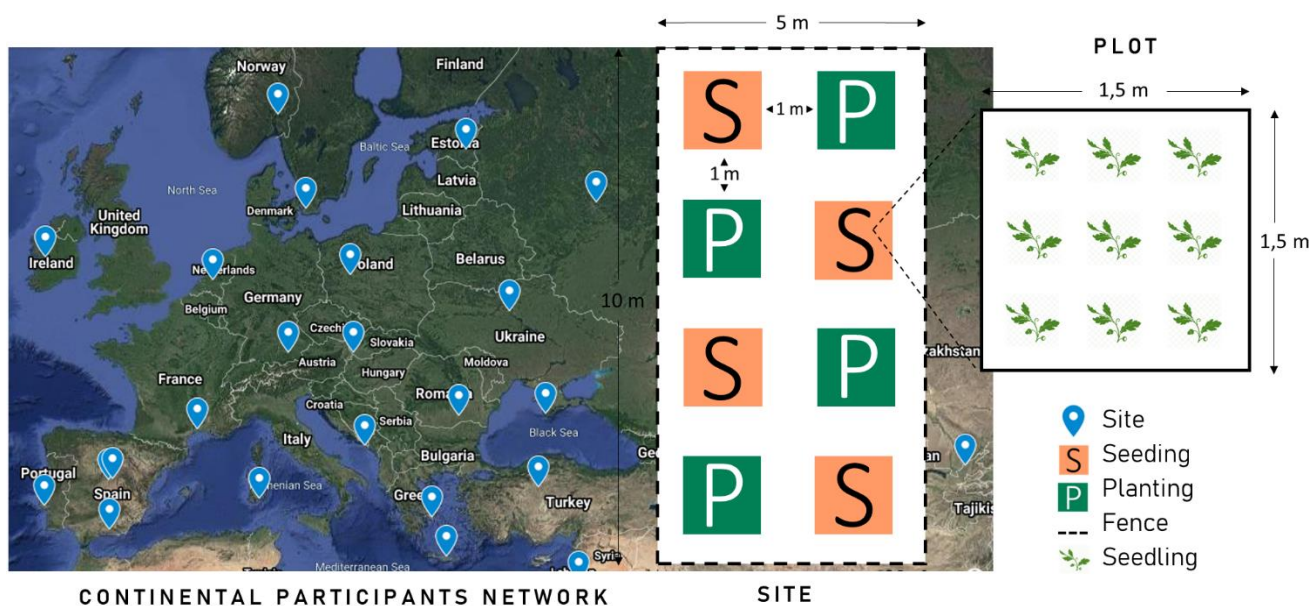

\*site locations are hypothetical; for agreed participants see link above

## How will we do it?

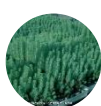

Participants will **establish a site** and select **local oak** species. One participant/ species allowed.

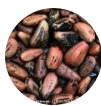

Participants will follow a standardised **protocol** for **seeding and planting**...

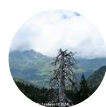

... and **measure** seedling performance.

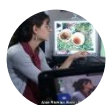

Through **meta-analysis**, we will **analyse the data** and publish the results collaboratively.

- **Autumn 2021 – 2024**
- Replicated across the **continent**
- **Open** to propose new sites
- **Low-cost** and easy-to-implement
- **Voluntary participation**
- **Self-financed**
- **More info** in June 2021

**Join in and participate!**

Register your interest [here](#)

Email: [seedvsplant@gmail.com](mailto:seedvsplant@gmail.com)

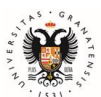

UNIVERSIDAD DE GRANADA

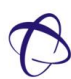

Facultad de Ciencias

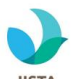

IISTA

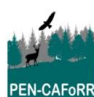

PEN-CAFORR

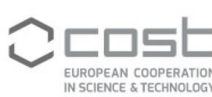

COST  
EUROPEAN COOPERATION  
IN SCIENCE & TECHNOLOGY

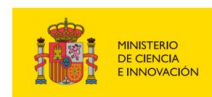

MINISTERIO DE CIENCIA E INNOVACION

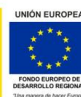

UNIÓN EUROPEA

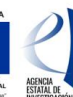

AGENCIA ESPAÑOLA DE INVESTIGACIÓN
